# Supplementary material for: What is Rural? Examining the relationship between human populations and their inter-connectedness in the context of communicable disease transmission
Source: Research Square preprint supplement (doi:10.21203/rs.3.rs-6648701/v1), 2025-05-15

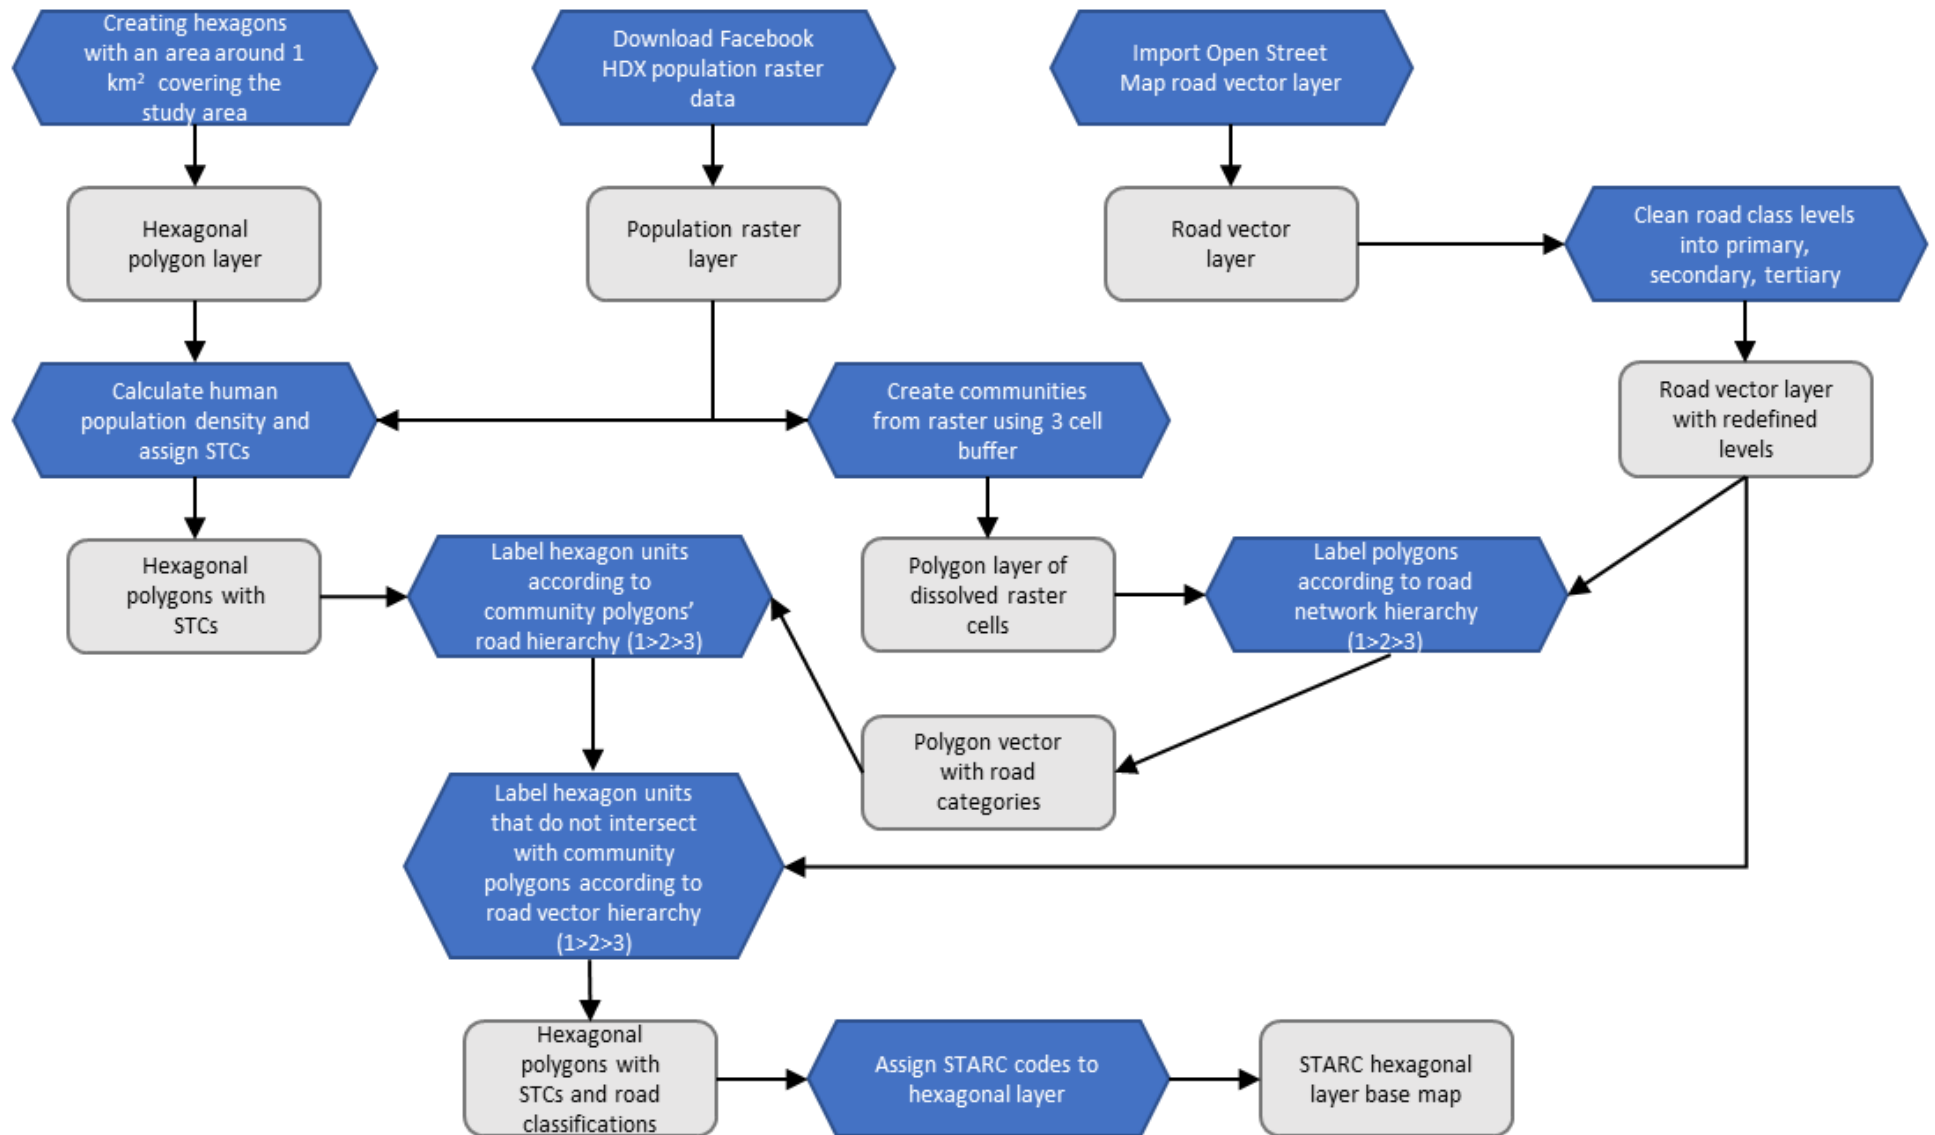

Supplement: Supplementary file [file a241866dc7e8a37f459a6ba9.pdf]
